# Supplementary material
Source: publisher figshare collection journal article supplement (https://tandf.figshare.com/ndownloader/files/17721386)
Supplement: Supplementary file 1 [file 17721386]

Supplementary Table 1. List of anatomical regions of interest (ROIs) used in the current study as predefined and implemented in CONN toolbox

| **Hemisphere** | **ROI / Anatomical label** | **Hemisphere** | **ROI / Anatomical label** |
| --- | --- | --- | --- |
| R/L | Frontal Pole | R/L | Temporal Fusiform Cortex, anterior division |
| R/L | Insular Cortex | R/L | Temporal Fusiform Cortex, posterior division |
| R/L | Superior Frontal Gyrus | R/L | Temporal Occipital Fusiform Cortex |
| R/L | Middle Frontal Gyrus | R/L | Occipital Fusiform Gyrus |
| R/L | Inferior Frontal Gyrus, pars triangularis | R/L | Frontal Operculum Cortex |
| R/L | Inferior Frontal Gyrus, pars opercularis | R/L | Central Opercular Cortex |
| R/L | Precentral Gyrus | R/L | Parietal Operculum Cortex |
| R/L | Temporal Pole | R/L | Planum Polare |
| R/L | Superior Temporal Gyrus, anterior division | R/L | Heschl's Gyrus |
| R/L | Superior Temporal Gyrus, posterior division | R/L | Planum Temporale |
| R/L | Middle Temporal Gyrus, anterior division | R/L | Supracalcarine Cortex |
| R/L | Middle Temporal Gyrus, posterior division | R/L | Occipital Pole |
| R/L | Middle Temporal Gyrus, temporooccipital part | R/L | Thalamus |
| R/L | Inferior Temporal Gyrus, anterior division | R/L | Caudate |
| R/L | Inferior Temporal Gyrus, posterior division | R/L | Putamen |
| R/L | Inferior Temporal Gyrus, temporooccipital part | R/L | Pallidum |
| R/L | Postcentral Gyrus | R/L | Hippocampus |
| R/L | Superior Parietal Lobule | R/L | Amygdala |
| R/L | Supramarginal Gyrus, anterior division | R/L | Accumbens |
| R/L | Supramarginal Gyrus, posterior division | - | Brain-Stem |
| R/L | Angular Gyrus | R/L | Cerebelum Crus 1 |
| R/L | Lateral Occipital Cortex, superior division | R/L | Cerebelum Crus 2 |
| R/L | Lateral Occipital Cortex, inferior division | R/L | Cerebelum 3 |
| R/L | Intracalcarine Cortex | R/L | Cerebelum 4 5 |
| - | Frontal Medial Cortex | R/L | Cerebelum 6 |
| R/L | Supplementary Motor Area | R/L | Cerebelum 7b |
| - | Subcallosal Cortex | R/L | Cerebelum 8 |
| R/L | Paracingulate Gyrus | R/L | Cerebelum 9 |
| - | Cingulate Gyrus, anterior division | R/L | Cerebelum 10 |
| - | Cingulate Gyrus, posterior division | - | Vermis 1 2 |
| - | Precuneous Cortex | - | Vermis 3 |
| R/L | Cuneal Cortex | - | Vermis 4 5 |
| R/L | Frontal Orbital Cortex | - | Vermis 6 |
| R/L | Parahippocampal Gyrus, anterior division | - | Vermis 7 |
| R/L | Parahippocampal Gyrus, posterior division | - | Vermis 8 |
| R/L | Lingual Gyrus | - | Vermis 9 |
|  | | - | Vermis 10 |

Note. R/L = Right/Left
